# Supplementary material
Source: PubMed Central journal article supplement (PMC4198442)
Supplement: NIHMS622892-supplement-supplemental_material.pdf [file NIHMS622892-supplement-supplemental_material.pdf]

## **SUPPLEMENTAL MATERIAL**

**Supplemental Figure 1. Flow diagram for selection of study population from the Atherosclerosis Risk in Communities (ARIC) Study cohort**

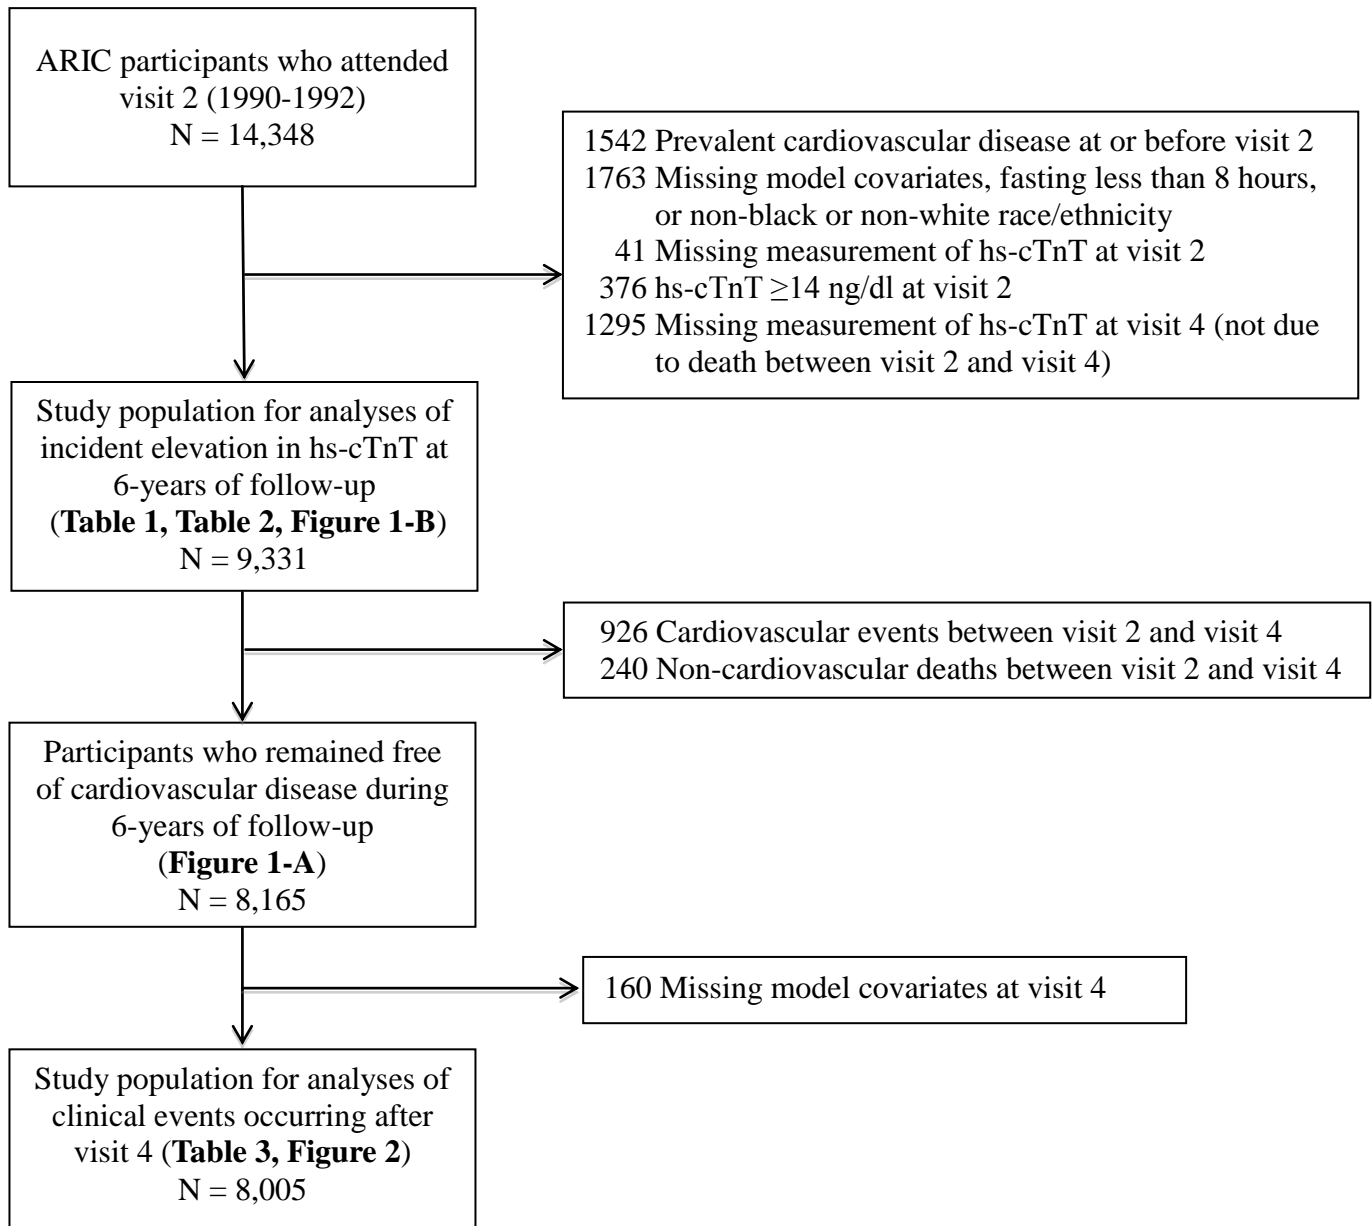

**Supplemental Table 1. Cross-tabulation of categories of highly sensitive cardiac troponin T (hs-cTnT) at two visits, 6 years apart (visit 2 in 1990-1992 and visit 4 in 1996-1998), among persons with hs-cTnT <14 ng/L (not elevated) at baseline (visit 2, 1990-1992) and remained free of cardiovascular disease during the 6-year follow-up period**

|                                      |                             | Hs-cTnT at visit 4 (1996-1998) |                |                |                        |               |
|--------------------------------------|-----------------------------|--------------------------------|----------------|----------------|------------------------|---------------|
|                                      |                             | <5 ng/L<br>(not detectable)    | 5-8 ng/L       | 9-13 ng/L      | ≥14 ng/L<br>(elevated) | <i>Total</i>  |
| Hs-cTnT at<br>visit 2<br>(1990-1992) | <5 ng/L<br>(not detectable) | 3,727<br>64.6%                 | 1,616<br>27.9% | 356<br>6.2%    | 78<br>1.3%             | 5,771<br>100% |
|                                      | 5-8 ng/L                    | 522<br>28.3%                   | 733<br>39.7%   | 444<br>24.1%   | 145<br>7.9%            | 1,844<br>100% |
|                                      | 9-13 ng/L                   | 26<br>4.7%                     | 131<br>23.8%   | 221<br>40.2%   | 172<br>31.3%           | 550<br>100%   |
|                                      | <i>Total</i>                | 4,275<br>52.4%                 | 2,474<br>30.3% | 1,021<br>12.5% | 395<br>4.8%            | 8,165<br>100% |

Values are *N* and row percentages.

**Supplemental Table 2. Adjusted\* risk ratios (95% confidence intervals) for the association of pre-diabetes and diabetes with incident elevated ( $\geq 14$  ng/L) highly sensitive cardiac troponin T (hs-cTnT), cardiovascular events, or death during the 6 year follow-up period according to diagnostic categories of pre-diabetes and diabetes defined by hemoglobin A1c (HbA1c) or fasting glucose at baseline (visit 2, 1990-1992), N=9,331**

|                                            | N     | Incident elevation in hs-cTnT |                  | Cardiovascular event |                  | Death  |                  |
|--------------------------------------------|-------|-------------------------------|------------------|----------------------|------------------|--------|------------------|
|                                            |       | Events                        | RR (95% CI)      | Events               | RR (95% CI)      | Events | RR (95% CI)      |
| <b>HbA1c diagnostic criteria</b>           |       |                               |                  |                      |                  |        |                  |
| < 5.7 % (no diabetes)                      | 6,333 | 214                           | 1 (reference)    | 437                  | 1 (reference)    | 136    | 1 (reference)    |
| 5.7 – 6.4% (pre-diabetes)                  | 2,172 | 116                           | 1.38 (1.07-1.77) | 293                  | 1.42 (1.20-1.69) | 77     | 1.29 (0.95-1.75) |
| Diabetes ( $\geq 6.5\%$ or diagnosis)      | 826   | 65                            | 2.46 (1.77-3.42) | 196                  | 2.85 (2.28-3.55) | 27     | 1.51 (0.95-2.39) |
| <i>p-value for trend†</i>                  |       |                               | <0.001           |                      | <0.001           |        | 0.040            |
| <b>Fasting glucose diagnostic criteria</b> |       |                               |                  |                      |                  |        |                  |
| < 100 mg/dL (no diabetes)                  | 3,751 | 104                           | 1 (reference)    | 260                  | 1 (reference)    | 83     | 1 (reference)    |
| 100 – 125 mg/dL (pre-diabetes)             | 4,536 | 211                           | 1.08 (0.84-1.39) | 456                  | 1.03 (0.87-1.22) | 124    | 1.08 (0.80-1.45) |
| Diabetes ( $\geq 126$ mg/dL or diagnosis)  | 1,044 | 80                            | 1.92 (1.37-2.68) | 210                  | 1.91 (1.53-2.40) | 33     | 1.32 (0.84-2.07) |
| <i>p-value for trend†</i>                  |       |                               | 0.001            |                      | <0.001           |        | 0.274            |

Abbreviations: RR, risk ratio; HbA1c, hemoglobin A1c; hs-cTnT, cardiac troponin T measured with a high sensitivity assay.

\*Adjusted for age (years), race-center (whites-Washington County; whites-Minneapolis; blacks-Jackson; blacks-Forsyth County, whites-Forsyth County), sex (male or female), body mass index (kg/m<sup>2</sup>), C-reactive protein (mg/L), smoking (current; former; never), mean systolic blood pressure (mm Hg), LDL-cholesterol (mg/dL), HDL-cholesterol (mg/dL), triglycerides (mg/dL), estimated glomerular filtration rate (mL/min/1.73m<sup>2</sup>), current use of hypertension medication (yes or no), current lipid-lowering medication use (yes or no), alcohol use (current; former; never) and left ventricular hypertrophy (yes or no).

†p-values for linear trend were obtained by numbering the categories 1 through 3 and including this categorical variable as a linear term in the model.

**Supplemental Table 3. Adjusted\* risk ratios (95% confidence intervals) for the association of pre-diabetes and diabetes with 6-year incident elevated ( $\geq 14$  ng/L) highly sensitive cardiac troponin T (hs-cTnT) according to diagnostic categories of pre-diabetes and diabetes defined by hemoglobin A1c (HbA1c) or fasting glucose at baseline (visit 2, 1990-1992) stratified by race group (black or white)**

**Whites**

|                                            | <b>Incident elevated hs-cTnT (<math>\geq 14</math> ng/L)<br/>N = 7,381</b> |               |                    |
|--------------------------------------------|----------------------------------------------------------------------------|---------------|--------------------|
|                                            | <b>N</b>                                                                   | <b>Events</b> | <b>RR (95% CI)</b> |
| <b>HbA1c diagnostic criteria</b>           |                                                                            |               |                    |
| < 5.7 % (no diabetes)                      | 5,520                                                                      | 189           | 1 (reference)      |
| 5.7 – 6.4% (pre-diabetes)                  | 1,387                                                                      | 76            | 1.37 (1.02-1.83)   |
| Diabetes ( $\geq 6.5\%$ or diagnosis)      | 474                                                                        | 45            | 2.58 (1.76-3.77)   |
| <i>p-value for trend†</i>                  |                                                                            |               | <i>&lt;0.001</i>   |
| <b>Fasting glucose diagnostic criteria</b> |                                                                            |               |                    |
| < 100 mg/dl (no diabetes)                  | 3,155                                                                      | 88            | 1 (reference)      |
| 100 – 125 mg/dl (pre-diabetes)             | 3,558                                                                      | 167           | 1.06 (0.80-1.40)   |
| Diabetes ( $\geq 126$ mg/dl or diagnosis)  | 668                                                                        | 55            | 1.78 (1.21-2.63)   |
| <i>p-value for trend†</i>                  |                                                                            |               | <i>0.017</i>       |

**Blacks**

|                                            | <b>Incident elevated hs-cTnT (<math>\geq 14</math> ng/L)<br/>N = 1,950</b> |               |                    |
|--------------------------------------------|----------------------------------------------------------------------------|---------------|--------------------|
|                                            | <b>N</b>                                                                   | <b>Events</b> | <b>RR (95% CI)</b> |
| <b>HbA1c diagnostic criteria</b>           |                                                                            |               |                    |
| < 5.7 % (no diabetes)                      | 813                                                                        | 25            | 1 (reference)      |
| 5.7 – 6.4% (pre-diabetes)                  | 785                                                                        | 40            | 1.33 (0.77-2.31)   |
| Diabetes ( $\geq 6.5\%$ or diagnosis)      | 352                                                                        | 20            | 2.05 (1.03-4.08)   |
| <i>p-value for trend†</i>                  |                                                                            |               | <i>0.047</i>       |
| <b>Fasting glucose diagnostic criteria</b> |                                                                            |               |                    |
| < 100 mg/dl (no diabetes)                  | 596                                                                        | 16            | 1 (reference)      |
| 100 – 125 mg/dl (pre-diabetes)             | 978                                                                        | 44            | 1.22 (0.66-2.26)   |
| Diabetes ( $\geq 126$ mg/dl or diagnosis)  | 376                                                                        | 25            | 2.25 (1.09-4.63)   |
| <i>p-value for trend†</i>                  |                                                                            |               | <i>0.030</i>       |

**NOTE: p-values for race interaction with diabetes status: 0.271 for HbA1c criteria; 0.956 for fasting glucose criteria.**

\*Adjusted for age (years), race-center (whites-Washington County; whites-Minneapolis; blacks-Jackson; blacks-Forsyth County, whites-Forsyth County), sex (male or female), body mass index (kg/m<sup>2</sup>), C-reactive protein (mg/L), smoking (current; former; never), mean systolic blood pressure (mm Hg), LDL-cholesterol (mg/dL), HDL-cholesterol (mg/dL), triglycerides (mg/dL), estimated glomerular filtration rate (mL/min/1.73m<sup>2</sup>), current use of hypertension medication (yes or no), current lipid-lowering medication use (yes or no), alcohol use (current; former; never) and left ventricular hypertrophy (yes or no).  
†p-values for linear trend were obtained by numbering the categories 1 through 3 and including this categorical variable as a linear term in the model.

**Supplemental Table 4. Adjusted\* hazard ratios (95% confidence intervals) for the association of visit 2 (1990-1992) diabetes status and 6-year incident elevated ( $\geq 14$  ng/L) highly sensitive cardiac troponin T (hs-cTnT) with incident coronary heart disease (CHD), heart failure and all-cause mortality (N=8,005)**

| Visit 4<br>hs-cTnT        | HbA1c diagnostic criteria                  | N     | CHD    |                  | Heart Failure |                  | Death  |                  |
|---------------------------|--------------------------------------------|-------|--------|------------------|---------------|------------------|--------|------------------|
|                           |                                            |       | Events | HR (95%CI)       | Events        | HR (95%CI)       | Events | HR (95%CI)       |
| hs-cTnT<br><14 ng/L       | No diabetes (< 5.7%)                       | 5,477 | 540    | 1 (reference)    | 370           | 1 (reference)    | 831    | 1 (reference)    |
|                           | Pre-diabetes (5.7-6.4 %)                   | 1,642 | 228    | 1.34 (1.14-1.58) | 193           | 1.32 (1.10-1.59) | 380    | 1.30 (1.15-1.48) |
|                           | Diabetes (diagnosis or $\geq 6.5$ %)       | 506   | 109    | 2.31 (1.86-2.88) | 115           | 2.49 (1.99-3.12) | 150    | 1.71 (1.43-2.06) |
| hs-cTnT<br>$\geq 14$ ng/L | No diabetes (< 5.7%)                       | 207   | 38     | 1.61 (1.15-2.26) | 48            | 3.21 (2.35-4.39) | 77     | 2.07 (1.62-2.64) |
|                           | Pre-diabetes (5.7-6.4 %)                   | 110   | 34     | 2.92 (2.04-4.17) | 36            | 4.30 (3.01-6.14) | 56     | 2.61 (1.97-3.45) |
|                           | Diabetes (diagnosis or $\geq 6.5$ %)       | 63    | 24     | 3.84 (2.52-5.84) | 28            | 6.37 (4.27-9.51) | 39     | 4.36 (3.14-6.07) |
|                           |                                            |       |        |                  |               |                  |        |                  |
|                           | <b>Fasting glucose diagnostic criteria</b> |       |        |                  |               |                  |        |                  |
| hs-cTnT<br><14 ng/L       | No diabetes (< 100 mg/dl)                  | 3,263 | 284    | 1 (reference)    | 224           | 1 (reference)    | 492    | 1 (reference)    |
|                           | Pre-diabetes (100-125 mg/dl)               | 3,678 | 455    | 1.13 (0.97-1.31) | 315           | 1.01 (0.85-1.20) | 671    | 1.05 (0.93-1.19) |
|                           | Diabetes (diagnosis or $\geq 126$ mg/dl)   | 684   | 138    | 1.98 (1.60-2.46) | 139           | 2.10 (1.68-2.63) | 198    | 1.62 (1.36-1.93) |
| hs-cTnT<br>$\geq 14$ ng/L | No diabetes (< 100 mg/dl)                  | 99    | 19     | 1.86 (1.16-2.98) | 24            | 3.32 (2.16-5.12) | 41     | 2.28 (1.64-3.15) |
|                           | Pre-diabetes (100-125 mg/dl)               | 206   | 50     | 2.12 (1.55-2.90) | 56            | 3.36 (2.47-4.58) | 86     | 2.16 (1.70-2.75) |
|                           | Diabetes (diagnosis or $\geq 126$ mg/dl)   | 75    | 27     | 3.50 (2.33-5.26) | 32            | 5.42 (3.67-7.99) | 45     | 3.66 (2.67-5.03) |

Abbreviations: CHD, coronary heart disease; CI, confidence interval; HR, hazard ratio; HbA1c, hemoglobin A1c; Hs-cTnT, cardiac troponin T measured with a high sensitivity assay.

\*Adjusted for age (years), race-center (whites-Washington County; whites-Minneapolis; blacks-Jackson; blacks-Forsyth County, whites-Forsyth County), sex (male or female), body mass index (kg/m<sup>2</sup>), C-reactive protein (mg/L), smoking (current; former; never), mean systolic blood pressure (mm Hg), LDL-cholesterol (mg/dL), HDL-cholesterol (mg/dL), triglycerides (mg/dL), estimated glomerular filtration rate (mL/min/1.73m<sup>2</sup>), current use of hypertension medication (yes or no), current lipid-lowering medication use (yes or no), alcohol use (current; former; never) and left ventricular hypertrophy (yes or no).

**Supplemental Table 5. Adjusted\* hazard ratios (95% confidence intervals) for the association of visit 2 (1990-1992) diabetes status and 6-year incident elevated ( $\geq 14$  ng/L) highly sensitive cardiac troponin T (hs-cTnT) with incident coronary heart disease (CHD), heart failure and all-cause mortality, stratified by race group (black or white)**

**Whites**

| Visit 4<br>hs-cTnT        | HbA1c diagnostic criteria            | N     | CHD    |                  | Heart Failure |                  | Death  |                  |
|---------------------------|--------------------------------------|-------|--------|------------------|---------------|------------------|--------|------------------|
|                           |                                      |       | Events | HR (95%CI)       | Events        | HR (95%CI)       | Events | HR (95%CI)       |
| hs-cTnT<br><14 ng/L       | No diabetes (< 5.7%)                 | 4,804 | 492    | 1 (reference)    | 314           | 1 (reference)    | 732    | 1 (reference)    |
|                           | Pre-diabetes (5.7-6.4 %)             | 1,039 | 168    | 1.37 (1.14-1.64) | 123           | 1.35 (1.09-1.67) | 248    | 1.29 (1.11-1.50) |
|                           | Diabetes (diagnosis or $\geq 6.5$ %) | 286   | 77     | 2.51 (1.95-3.23) | 64            | 2.41 (1.82-3.19) | 97     | 1.81 (1.45-2.25) |
| hs-cTnT<br>$\geq 14$ ng/L | No diabetes (< 5.7%)                 | 182   | 34     | 1.61 (1.13-2.30) | 42            | 3.30 (2.36-4.62) | 68     | 2.10 (1.62-2.72) |
|                           | Pre-diabetes (5.7-6.4 %)             | 75    | 22     | 2.61 (1.69-4.04) | 22            | 4.06 (2.60-6.33) | 40     | 2.84 (2.05-3.93) |
|                           | Diabetes (diagnosis or $\geq 6.5$ %) | 45    | 18     | 3.61 (2.23-5.86) | 21            | 6.25 (3.94-9.93) | 30     | 4.27 (2.93-6.23) |

**Blacks**

| Visit 4<br>hs-cTnT        | HbA1c diagnostic criteria            | N   | CHD    |                   | Heart Failure |                   | Death  |                  |
|---------------------------|--------------------------------------|-----|--------|-------------------|---------------|-------------------|--------|------------------|
|                           |                                      |     | Events | HR (95%CI)        | Events        | HR (95%CI)        | Events | HR (95%CI)       |
| hs-cTnT<br><14 ng/L       | No diabetes (< 5.7%)                 | 673 | 48     | 1 (reference)     | 56            | 1 (reference)     | 99     | 1 (reference)    |
|                           | Pre-diabetes (5.7-6.4 %)             | 603 | 60     | 1.24 (0.84-1.83)  | 70            | 1.15 (0.80-1.64)  | 132    | 1.27 (0.97-1.67) |
|                           | Diabetes (diagnosis or $\geq 6.5$ %) | 220 | 32     | 1.80 (1.12-2.89)  | 51            | 2.37 (1.59-3.54)  | 53     | 1.57 (1.10-2.23) |
| hs-cTnT<br>$\geq 14$ ng/L | No diabetes (< 5.7%)                 | 25  | 4      | 1.86 (0.65-5.29)  | 6             | 2.63 (1.10-6.27)  | 9      | 1.93 (0.95-3.91) |
|                           | Pre-diabetes (5.7-6.4 %)             | 35  | 12     | 4.01 (2.01-7.97)  | 14            | 4.25 (2.26-8.00)  | 16     | 2.18 (1.25-3.80) |
|                           | Diabetes (diagnosis or $\geq 6.5$ %) | 18  | 6      | 4.40 (1.80-10.80) | 7             | 5.19 (2.24-12.03) | 9      | 4.62 (2.27-9.43) |

**NOTE: p-value for race interactions with diabetes-hs-cTnT elevation status (4-category variable): 0.832 for CHD, 0.954 for HF, and 0.912 for all-cause mortality.**

Abbreviations: CHD, coronary heart disease; CI, confidence interval; HR, hazard ratio; HbA1c, hemoglobin A1c; Hs-cTnT, cardiac troponin T measured with a high sensitivity assay.

\*Adjusted for age (years), race-center (whites-Washington County; whites-Minneapolis; blacks-Jackson; blacks-Forsyth County, whites-Forsyth County), sex (male or female), body mass index (kg/m<sup>2</sup>), C-reactive protein (mg/L), smoking (current; former; never), mean systolic blood pressure (mm Hg), LDL-cholesterol (mg/dL), HDL-cholesterol (mg/dL), triglycerides (mg/dL), estimated glomerular filtration rate (mL/min/1.73m<sup>2</sup>), current use of hypertension medication (yes or no), current lipid-lowering medication use (yes or no), alcohol use (current; former; never) and left ventricular hypertrophy (yes or no).



**Supplemental Table 6. Adjusted\* hazard ratios (95% confidence intervals) for the association of visit 2 (1990-1992) diabetes status and 6-year incident elevated ( $\geq 14$  ng/L) highly sensitive cardiac troponin T (hs-cTnT) at visit 4 (1996-1998) with incident coronary heart disease (CHD), heart failure and all-cause mortality (N=7,847)**

| Visit 4<br>hs-cTnT                         | Visit 2 diabetes status -<br>HbA1c diagnostic criteria | Incident<br>diabetes<br>(visit 3 or 4) | N     | CHD              |                   | Heart Failure    |                   | Death            |                   |
|--------------------------------------------|--------------------------------------------------------|----------------------------------------|-------|------------------|-------------------|------------------|-------------------|------------------|-------------------|
|                                            |                                                        |                                        |       | Events           | HR (95%CI)        | Events           | HR (95%CI)        | Events           | HR (95%CI)        |
| hs-cTnT<br><14 ng/L                        | No diabetes (< 5.7%)                                   | No                                     | 5,312 | 512              | 1 (reference)     | 357              | 1 (reference)     | 794              | 1 (reference)     |
|                                            |                                                        | Yes                                    | 59    | 12               | 2.00 (1.12-3.55)  | 6                | 1.57 (0.70-3.54)  | 16               | 2.41 (1.47-3.98)  |
|                                            | Pre-diabetes (5.7-6.4 %)                               | No                                     | 1,467 | 196              | 1.31 (1.11-1.56)  | 163              | 1.24 (1.02-1.50)  | 330              | 1.27 (1.11-1.45)  |
|                                            |                                                        | Yes                                    | 134   | 26               | 1.95 (1.30-2.91)  | 23               | 2.23 (1.45-3.43)  | 39               | 1.97 (1.42-2.74)  |
| Diabetes (diagnosis or $\geq 6.5$ %)       | -                                                      | 502                                    | 109   | 2.38 (1.91-2.98) | 115               | 2.51 (2.00-3.15) | 150               | 1.76 (1.46-2.12) |                   |
| hs-cTnT<br>$\geq 14$ ng/L                  | No diabetes (< 5.7%)                                   | No                                     | 196   | 35               | 1.61 (1.14-2.29)  | 44               | 3.21 (2.32-4.43)  | 72               | 2.11 (1.64-2.71)  |
|                                            |                                                        | Yes                                    | 5     | 3                | 5.04 (1.60-15.84) | 1                | 2.36 (0.33-16.92) | 2                | 1.89 (0.47-7.59)  |
|                                            | Pre-diabetes (5.7-6.4 %)                               | No                                     | 92    | 29               | 3.08 (2.10-4.52)  | 30               | 4.70 (3.20-6.91)  | 45               | 2.69 (1.98-3.66)  |
|                                            |                                                        | Yes                                    | 17    | 5                | 2.82 (1.16-6.86)  | 6                | 3.17 (1.40-7.18)  | 11               | 2.61 (1.43-4.77)  |
| Diabetes (diagnosis or $\geq 6.5$ %)       | -                                                      | 63                                     | 24    | 3.95 (2.60-6.02) | 28                | 6.40 (4.29-9.56) | 39                | 4.46 (3.20-6.21) |                   |
| <b>Fasting glucose diagnostic criteria</b> |                                                        |                                        |       |                  |                   |                  |                   |                  |                   |
| hs-cTnT<br><14 ng/L                        | No diabetes (< 100 mg/dl)                              | No                                     | 3,170 | 274              | 1 (reference)     | 219              | 1 (reference)     | 472              | 1 (reference)     |
|                                            |                                                        | Yes                                    | 27    | 3                | 1.10 (0.35-3.45)  | 2                | 1.09 (0.27-4.41)  | 5                | 1.72 (0.71-4.17)  |
|                                            | Pre-diabetes (100-125 mg/dl)                           | No                                     | 3,470 | 414              | 1.09 (0.93-1.27)  | 285              | 0.96 (0.80-1.15)  | 615              | 1.04 (0.92-1.17)  |
|                                            |                                                        | Yes                                    | 127   | 26               | 1.99 (1.32-3.01)  | 19               | 1.78 (1.10-2.87)  | 39               | 1.97 (1.41-2.76)  |
| Diabetes (diagnosis or $\geq 126$ mg/dl)   | -                                                      | 680                                    | 138   | 2.01 (1.62-2.50) | 139               | 2.09 (1.67-2.62) | 198               | 1.67 (1.40-1.99) |                   |
| hs-cTnT<br>$\geq 14$ ng/L                  | No diabetes (< 100 mg/dl)                              | No                                     | 95    | 19               | 1.95 (1.22-3.13)  | 22               | 3.25 (2.07-5.10)  | 39               | 2.28 (1.64-3.19)  |
|                                            |                                                        | Yes                                    | 1     | 0                | -                 | 1                | 6.13 (0.83-45.03) | 1                | 9.72 (1.34-70.49) |
|                                            | Pre-diabetes (100-125 mg/dl)                           | No                                     | 186   | 43               | 2.10 (1.51-2.92)  | 50               | 3.47 (2.51-4.78)  | 77               | 2.29 (1.78-2.94)  |
|                                            |                                                        | Yes                                    | 16    | 7                | 3.11 (1.46-6.63)  | 4                | 2.10 (0.77-5.70)  | 7                | 1.61 (0.76-3.42)  |
| Diabetes (diagnosis or $\geq 126$ mg/dl)   | -                                                      | 75                                     | 27    | 3.54 (2.35-5.33) | 32                | 5.38 (3.65-7.94) | 45                | 3.74 (2.72-5.13) |                   |

Abbreviations: CHD, coronary heart disease; CI, confidence interval; HR, hazard ratio; HbA1c, hemoglobin A1c; Hs-cTnT, cardiac troponin T measured with a high sensitivity assay.

\*Adjusted for age (years), race-center (whites-Washington County; whites-Minneapolis; blacks-Jackson; blacks-Forsyth County, whites-Forsyth County), sex (male or female), body mass index (kg/m<sup>2</sup>), C-reactive protein (mg/L), smoking (current; former; never), mean systolic blood pressure (mm Hg), LDL-cholesterol (mg/dL), HDL-cholesterol (mg/dL), triglycerides (mg/dL), estimated glomerular filtration rate (mL/min/1.73m<sup>2</sup>), current use of hypertension medication (yes or no), current lipid-lowering medication use (yes or no), alcohol use (current; former; never) and left ventricular hypertrophy (yes or no).
